# Supplementary material
Source: PubMed Central journal article supplement (PMC5801046)
Supplement: NIHMS933460-supplement-Supplemental_Information.pdf [file NIHMS933460-supplement-Supplemental_Information.pdf]

## *Supplemental Information*

### *Variation in LOV Photoreceptor Activation Dynamics Probed by Time Resolved*

### *Infrared Spectroscopy*

James N. Iuliano,<sup>†</sup> Agnieszka A. Gil,<sup>†</sup> Sergey P. Laptanok,<sup>‡,‡</sup> Christopher R. Hall,<sup>‡</sup> Jinnette Tolentino Collado,<sup>†</sup> Andras Lukacs,<sup>‡,§</sup> Safaa A. Hag Ahmed,<sup>†</sup> Jenna Abyad,<sup>†</sup> Taraneh Daryaei,<sup>†</sup> Gregory M. Greetham,<sup>||</sup> Igor V. Sazanovich,<sup>||</sup> Boris Illarionov,<sup>¥</sup> Adelbert Bacher,<sup>#</sup> Markus Fischer,<sup>¥</sup> Michael Towrie,<sup>||</sup> Jarrod B. French,<sup>†</sup> Stephen R. Meech,<sup>‡\*</sup> and Peter J. Tonge.<sup>†\*</sup>

<sup>†</sup>*Department of Chemistry, Stony Brook University, New York, 11794, USA* <sup>‡</sup>*School of Chemistry, University of East Anglia, Norwich, NR4 7TJ, U.K.* <sup>§</sup>*Department of Biophysics, Medical School, University of Pecs, Szigeti út 12, 7624 Pecs, Hungary.* <sup>||</sup>*Central Laser Facility, Research Complex at Harwell, Rutherford Appleton Laboratory, Didcot, OX11 0QX, U.K.,* <sup>#</sup>*Department Chemie, Technische Universität München, D-85747 Garching, Germany,* <sup>¥</sup>*Institut für Biochemie und Lebensmittelchemie, Universität Hamburg, Grindelallee 117, D-20146 Hamburg, Germany*

<sup>‡</sup>Current address (SPL): Biological and Environmental Science and Engineering Division, King Abdullah University of Science and Technology, P.O. Box 4700, Thuwal 23955-6900, Kingdom of Saudi Arabia.

\*Authors to whom correspondence should be addressed: Email: s.meech@uea.ac.uk (SRM); peter.tonge@stonybrook.edu (PJT)

| <b>Table S1: Assignment of LOV Spectra</b> |        |      |      |       |
|--------------------------------------------|--------|------|------|-------|
| <b>EAS1</b>                                | AsLOV2 | YtvA | LovK | EL222 |
| 1FMN*                                      | 1375   | 1379 | 1382 | 1378  |
| 1FMN*                                      | 1413   | 1418 | 1424 | 1419  |
| GS Bleach                                  | 1550   | 1548 | 1552 | 1544  |
| GS Bleach                                  | 1583   | 1580 | 1586 | 1580  |
| Protein                                    |        | 1615 | 1612 | 1615  |
| C2=O                                       | 1622   | 1629 | 1632 | 1631  |
|                                            |        |      |      |       |
| Asn (-)                                    | 1669   | 1663 | 1662 | 1652  |
| Gln513                                     | 1690   | 1702 | 1700 | 1700  |
|                                            |        |      |      |       |
|                                            |        |      |      |       |
|                                            |        |      |      |       |
| <b>EAS2</b>                                |        |      |      |       |
| 3FMN*                                      | 1438   | 1440 | 1443 | 1428  |
| 3FMN*                                      | 1491   | 1491 | 1488 | 1488  |
| GS Bleach                                  | 1550   | 1548 | 1552 | 1544  |
| GS Bleach                                  | 1583   | 1580 | 1586 | 1580  |
| Protein                                    |        | 1615 | 1612 | 1615  |
| C2=O                                       | 1622   | 1629 | 1632 | 1631  |
| Asn (-)                                    | 1669   | 1663 | 1662 | 1652  |
| Gln513                                     | 1690   | 1702 | 1700 | 1700  |
|                                            |        |      |      |       |
|                                            |        |      |      |       |
|                                            |        |      |      |       |
| <b>EAS3</b>                                |        |      |      |       |
| Protein (-)                                | 1404   | 1406 | 1411 | 1406  |
| Protein (+)                                | 1417   | 1417 | 1424 | 1418  |
| Protein (-)                                | 1426   | 1430 | 1433 | 1430  |
| Protein (+)                                | 1435   | 1443 | 1453 | 1450  |
| β-sheet N-H                                |        | 1526 |      |       |
| C4C10a (+)                                 | 1541   | 1541 | 1547 | 1553  |
| C4C10a (-)                                 | 1553   | 1550 | 1553 | 1541  |
| β-sheet C=O                                | 1625   | 1619 | 1633 | 1631  |
| Jα helix                                   | 1634   |      |      |       |
| β-sheet C=O                                |        |      | 1650 | 1645  |
| FMN/Protein                                | 1665   | 1667 | 1669 | 1665  |
| Gln513                                     | 1690   | 1695 | 1695 | 1700  |
| C4=O                                       | 1722   | 1720 | 1718 |       |

**Table S1: Band assignments were based on the effect of <sup>13</sup>C labelling on the spectrum of AsLOV2.**

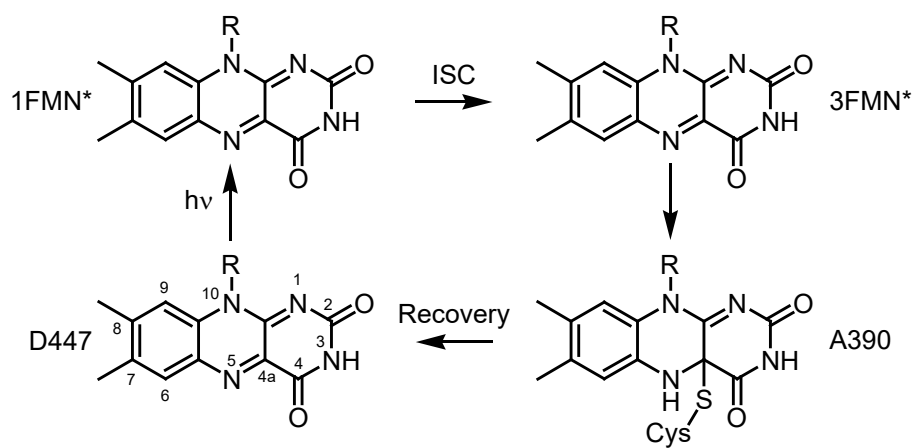

**Figure S1: The LOV Photocycle**

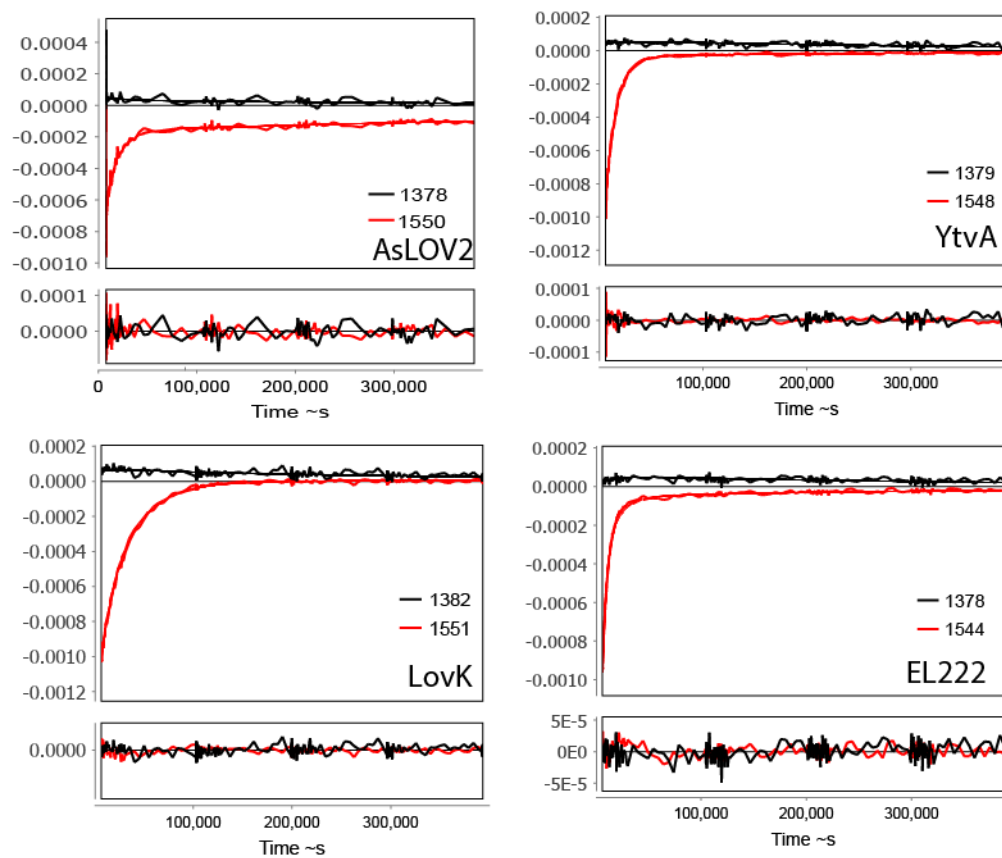

**Figure S2: Kinetic traces and residuals showing quality of fit.** Excited state decay is shown in black and ground state recovery is shown in red.

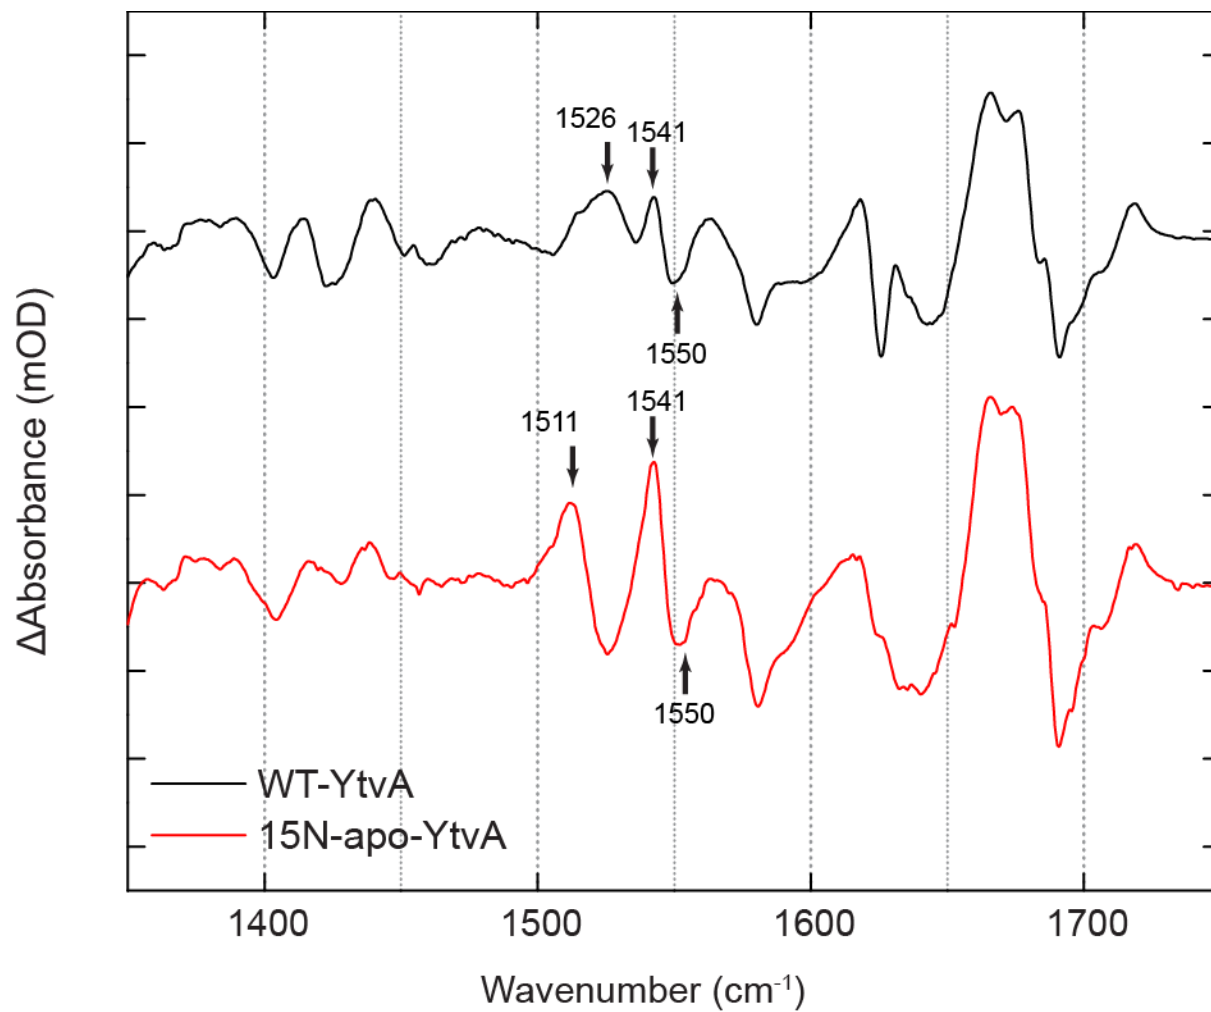

**Figure S3: L-D FTIR of [<sup>15</sup>N-apoprotein]-YtvA**

```

AsLOV2 -----LATTLERIEKNFVITDPRLPDNPIIFA
YtvA MASFQS-----FGIPGQLE-----VIKKALDHVRVGVVITDPALEDNPIVYV
LovK MEDYSESRRAGERLAAGHGVD-----PFAAAISATRMAMIVADATQPDIPPIIFA
EL222 MGQDRP-----IDGSGAPGADDRVEVQPPAQWVLDLIEASPIASVVSDPRLADNPLIAI
          .   :.           :::*      * *::

AsLOV2 SDSFQLTEYSREEILGRNCRFLQGPETDRATVRKIRDAIDNQTEVTVQLINYTKSGKKF
YtvA NQGFVQMTGYETEEILGKNCRFLQ GKHTDPAEVDNIRTALQNKEPVTVQIQNYKKDGTMF
LovK NDAFLRLTGYARDEVI GRNCRFLQ GPDTDPKAIQAVRDALAAGEDVAVDLLNYRKDGSPF
EL222 NQAFDLDLTYSEEECVGRNCRFLA GSGTEPWLTDKIRQGVREHKPVLVEILNYKKDGTPF
  .:. *  : * *  : *  : * : * * * * * * * * :           : *  . :           * * : : * * . * . *

AsLOV2 WNL FHLQPMRDQKGDVQYFIGVQLDGTEHVRDAAER----EGV--MLIKKTAENIDEAAK
YtvA WNE LNIDPMEIE--DKTYFVGIQNDITKQKEYEKL-----LED SLTEITALS-
LovK WNA LNMSPVRNDAGQLVYFFGSQVDVTDKKVVELRARDHSDGLQOMVEERTRE-----
EL222 RNA VLVAPIYDDDDDELLYFLGSQVEVDDDDQPNMGMARRERAA--EM-----
          * . : * : : : * * . * * : ..

AsLOV2 EL
YtvA --
LovK --
EL222 --

```

**Figure S4: Sequence alignment of the AsLOV2, YtvA, LovK, and EL222 LOV domains.** Conserved LOV core motif is highlighted in yellow and shows the Gln to Ala replacement in EL222 and the prediction of Gln for LovK. F494 in AsLOV2 and corresponding residues in YtvA, LovK, and EL222 are highlighted in green.

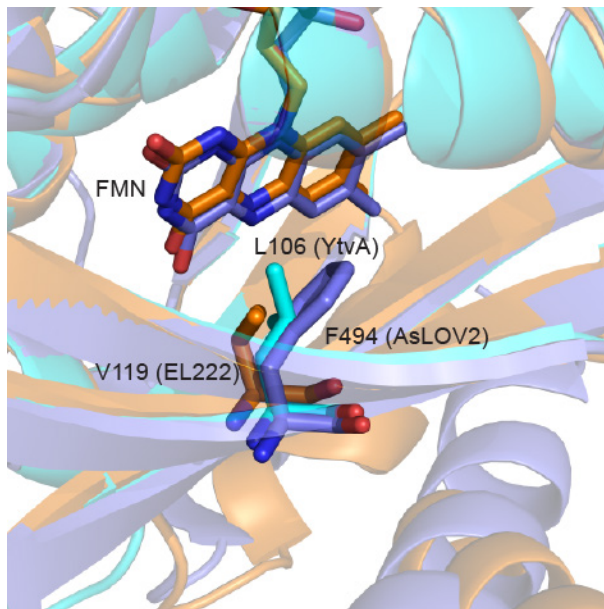

**Figure S5: F494 forms a  $\pi$ -stacking interaction with the isoalloxazine ring of FMN.**

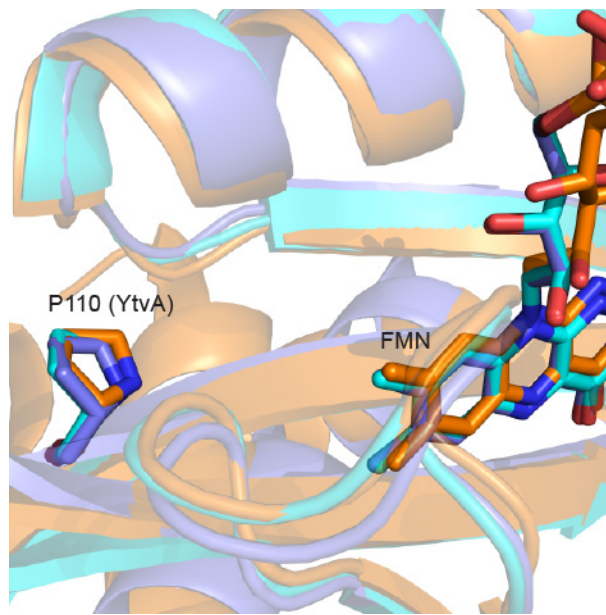

**Figure S6: Proline residues on the LOV  $\beta$ -sheet.**
